# Supplementary material for: N 2 fixation in the Mediterranean Sea related to the composition of the diazotrophic community and impact of dust under present and future environmental conditions
Source: Copernicus journal article supplement (doi:10.5194/bg-19-415-2022), 2022-01-25

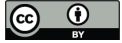

*Supplement of*

**$N_2$  fixation in the Mediterranean Sea related to the composition of the diazotrophic community and impact of dust under present and future environmental conditions**

**Céline Ridame et al.**

*Correspondence to:* Céline Ridame ([celine.ridame@locean.ipsl.fr](mailto:celine.ridame@locean.ipsl.fr))

The copyright of individual parts of the supplement might differ from the article licence.

Table S1: Nutrients stocks (DIP, DFe, NO<sub>3</sub><sup>-</sup>) in the surface mixed layer (SML) and in the euphotic layer (surface to the 1%PAR depth). The mixed layer depth (MLD) was estimated from density profiles as the depth where the residual mass content (i.e., the vertical integral of the density anomaly relative to surface) is equal to 1 kg m<sup>-2</sup>.

\* at stations 1 to 4, micromolar NO<sub>3</sub><sup>-</sup> concentrations were under detection limit (0.05 μM) in the upper 50 m and samples for the nanomolar level determination (LWCC) were lost. For these stations, maximum NO<sub>3</sub><sup>-</sup> stocks were calculated considering a concentration of 0.05 μM when NO<sub>3</sub><sup>-</sup> concentrations were under this detection limit.

|      | Lat.  | Long. | MLD | 1%<br>PAR<br>depth | DIP Stock<br>SML     | DFe<br>Stock<br>SML  | NO <sub>3</sub> <sup>-</sup><br>Stock<br>SML | DIP Stock<br>euphotic | DFe<br>Stock<br>euphotic | NO <sub>3</sub> <sup>-</sup><br>Stock<br>euphotic |
|------|-------|-------|-----|--------------------|----------------------|----------------------|----------------------------------------------|-----------------------|--------------------------|---------------------------------------------------|
|      | °N    | °E    | m   | m                  | μmol.m <sup>-2</sup> | μmol.m <sup>-2</sup> | μmol.m <sup>-2</sup>                         | μmol.m <sup>-2</sup>  | μmol.m <sup>-2</sup>     | mmol.m <sup>-2</sup>                              |
| ST01 | 41.89 | 6.33  | 21  | 58                 | 160                  | 18.2                 | <1050*                                       | 525                   | 45                       | <16.4*                                            |
| ST02 | 40.51 | 6.73  | 21  | 72                 | 227                  | 24.0                 | <1050*                                       | 1277                  | 63                       | <27.7*                                            |
| ST03 | 39.13 | 7.68  | 11  | 85                 | 53                   | 24.7                 | <550*                                        | 1080                  | 142                      | <10.3*                                            |
| ST04 | 37.98 | 7.98  | 15  | 66                 | 106                  | 30.1                 | <750*                                        | 1284                  | 113                      | <13.0*                                            |
| ST05 | 38.95 | 11.02 | 9   | 78                 | 112                  | 10.9                 | 258                                          | 1306                  | 80                       | 16.6                                              |
| TYR  | 39.34 | 12.59 | 9   | 68                 | 64                   | 11.7                 | 137                                          | 693                   | 71                       | 1.5                                               |
| ST06 | 38.81 | 14.50 | 18  | 67                 | 198                  | 35.1                 | 162                                          | 708                   | 97                       | 5.0                                               |
| ST07 | 36.66 | 18.15 | 18  | 75                 | 104                  | 24.7                 | 162                                          | 458                   | 83                       | 2.2                                               |
| ION  | 35.49 | 19.78 | 14  | 87                 | 142                  | 23.4                 | 195                                          | 982                   | 126                      | 1.6                                               |
| ST08 | 36.21 | 16.63 | 14  | 75                 | 169                  | 22.2                 | 911                                          | 950                   | 87                       | 5.5                                               |
| ST09 | 38.13 | 5.84  | 7   | 87                 | 77                   | 10.0                 | 819                                          | 1183                  | 80                       | 15.7                                              |
| FAST | 37.95 | 2.90  | 9   | 83                 | 99                   | 13.8                 | 716                                          | 2775                  | 94                       | 13.1                                              |
| ST10 | 37.45 | 1.57  | 19  | 87                 | 308                  | 22.3                 | 2016                                         | 3187                  | 84                       | 28.3                                              |

Table S2: FrameBot annotations of the nearest known references of the 20 most abundant ASVs across all samples.

| Feature ID                       | Reads  | % of all reads | FrameBot annotation                                                                            | % Identity |
|----------------------------------|--------|----------------|------------------------------------------------------------------------------------------------|------------|
| 4f130f7262e949bc20ae5dcd3eee35db | 247955 | 28,12          | 145569915 1G B 1 1432264_1433145_CP000304 Pseudomonas_stutzeri_A1501                           | 98,925     |
| 00c85e66b298fa566b5587b50e7f3f7f | 114420 | 12,97          | 213578830 1B B 1 FJ170277_complement_13629_14492 Uncultured_cyanobacterium_group_A_nif_cluster | 100        |
| 74fc02da755a36c195bbece4dcfb6c3e | 69304  | 7,86           | 213578830 1B B 1 FJ170277_complement_13629_14492 Uncultured_cyanobacterium_group_A_nif_cluster | 100        |
| 3aa5d34aa2ac8a8f7506577551a510a0 | 65812  | 7,46           | 145569915 1G B 1 1432264_1433145_CP000304 Pseudomonas_stutzeri_A1501                           | 98,925     |
| 9d2f4ec132745ac31c2340a031d726ee | 63165  | 7,16           | 145569915 1G B 1 1432264_1433145_CP000304 Pseudomonas_stutzeri_A1501                           | 98,925     |
| ab0ecbee56ec313cda72e61ffdcfb494 | 56134  | 6,37           | 145569915 1G B 1 1432264_1433145_CP000304 Pseudomonas_stutzeri_A1501                           | 98,925     |
| 3474fb451f8b288dcb190ddd9933884  | 38007  | 4,31           | 145569915 1G B 1 1432264_1433145_CP000304 Pseudomonas_stutzeri_A1501                           | 98,925     |
| e067e3ba7a65706248056188777e1763 | 27641  | 3,13           | 213578830 1B B 1 FJ170277_complement_13629_14492 Uncultured_cyanobacterium_group_A_nif_cluster | 100        |
| 66b09bb28a2d6b2c8a074c7ef455abcf | 25793  | 2,92           | 213578830 1B B 1 FJ170277_complement_13629_14492 Uncultured_cyanobacterium_group_A_nif_cluster | 100        |
| f60991866f34f6a2e51e132307e5bad4 | 19615  | 2,22           | 142330 1G B 1 525_1397_M11579 Azotobacter_vinelandii_DK_cluster_                               | 96,774     |
| 106b2b300923c99f0a32e68826fb05c3 | 18111  | 2,05           | 213578830 1B B 1 FJ170277_complement_13629_14492 Uncultured_cyanobacterium_group_A_nif_cluster | 100        |
| 769ab520efbbb7280f93376b03c1c171 | 18051  | 2,05           | 110168604 1B B 1 6380808_6381698_CP000393 Trichodesmium_erythraeum_IMS101                      | 98,925     |
| e48ca7a05e71d1f402f7f36cc81cb450 | 8525   | 0,97           | 145569915 1G B 1 1432264_1433145_CP000304 Pseudomonas_stutzeri_A1501                           | 98,925     |
| 717a2d9ae33622985dde7cb936331c18 | 8214   | 0,93           | 145569915 1G B 1 1432264_1433145_CP000304 Pseudomonas_stutzeri_A1501                           | 98,925     |
| b5e593c3cbea96f53a5e597bd502715d | 8117   | 0,92           | 145569915 1G B 1 1432264_1433145_CP000304 Pseudomonas_stutzeri_A1501                           | 98,925     |
| 12fa8a7272c36cef116e673efd697ce5 | 5548   | 0,63           | 145569915 1G B 1 1432264_1433145_CP000304 Pseudomonas_stutzeri_A1501                           | 98,925     |
| 90c741ef17c027078254972c547eaaaa | 4206   | 0,48           | 142330 1G B 1 525_1397_M11579 Azotobacter_vinelandii_DK_cluster_                               | 96,774     |
| 226e7bd030e1242d67bffeacc3dfb50a | 3984   | 0,45           | 242120818 3E C 2 CP001649_complement_488297_489124 Desulfovibrio_salexigens_DSM_2638           | 98,925     |
| 5cd4866faf5030e82d079b211a72997b | 3410   | 0,39           | 145569915 1G B 1 1432264_1433145_CP000304 Pseudomonas_stutzeri_A1501                           | 98,925     |
| 0eabd0c5b6d4ada9c3ed3b7458a4d431 | 3135   | 0,36           | 145569915 1G B 1 1432264_1433145_CP000304 Pseudomonas_stutzeri_A1501                           | 98,925     |

Table S3: FrameBot annotations of the nearest known references of the 20 most abundant ASVs at station 10

| Feature ID                       | Reads | % of all | FrameBot annotation                                                                            | %Identity | Taxonomic group      |
|----------------------------------|-------|----------|------------------------------------------------------------------------------------------------|-----------|----------------------|
| bbc2563311419e73e0612506d8153935 | 58485 | 39,55    | 213578830 1B B 1 FJ170277_complement_13629_14492 Uncultured_cyanobacterium_group_A_nif_cluster | 100       | UCYN-A4              |
| 74fc02da755a36c195bbece4dcfb6c3e | 38889 | 26,30    | 213578830 1B B 1 FJ170277_complement_13629_14492 Uncultured_cyanobacterium_group_A_nif_cluster | 100       | UCYN-A1              |
| a5ee5acf641bc085da0aa23b0637b4e4 | 13007 | 8,80     | 213578830 1B B 1 FJ170277_complement_13629_14492 Uncultured_cyanobacterium_group_A_nif_cluster | 100       | UCYN-A4              |
| 66b09bb28a2d6b2c8a074c7ef455abc  | 10132 | 6,85     | 213578830 1B B 1 FJ170277_complement_13629_14492 Uncultured_cyanobacterium_group_A_nif_cluster | 100       | UCYN-A2              |
| 106b2b300923c99f0a32e68826fb05c3 | 9164  | 6,20     | 213578830 1B B 1 FJ170277_complement_13629_14492 Uncultured_cyanobacterium_group_A_nif_cluster | 100       | UCYN-A1              |
| 00c85e66b298fa566b5587b50e7f3f7f | 5970  | 4,04     | 213578830 1B B 1 FJ170277_complement_13629_14492 Uncultured_cyanobacterium_group_A_nif_cluster | 100       | UCYN-A3              |
| e067e3ba7a65706248056188777e1763 | 1347  | 0,91     | 213578830 1B B 1 FJ170277_complement_13629_14492 Uncultured_cyanobacterium_group_A_nif_cluster | 100       | UCYN-A3              |
| 0d074fa0254f3044df289a87f37c42e6 | 1106  | 0,75     | 213578830 1B B 1 FJ170277_complement_13629_14492 Uncultured_cyanobacterium_group_A_nif_cluster | 100       | UCYN-A4              |
| f4a69bcdæa044367c837f016e3ffaec  | 1095  | 0,74     | 213578830 1B B 1 FJ170277_complement_13629_14492 Uncultured_cyanobacterium_group_A_nif_cluster | 100       | UCYN-A1              |
| ab0ecbee56ec313cda72e61ffdcb494  | 1064  | 0,72     | 145569915 1G B 1 1432264_1433145_CP000304 Pseudomonas_stutzeri_A1501                           | 98,925    | Gamma proteobacteria |
| d2675af859c82c0d4bb46f8c3d91311d | 1024  | 0,69     | 213578830 1B B 1 FJ170277_complement_13629_14492 Uncultured_cyanobacterium_group_A_nif_cluster | 100       | UCYN-A1              |
| 4f130f7262e949bc20ae5dcd3ee35db  | 948   | 0,64     | 145569915 1G B 1 1432264_1433145_CP000304 Pseudomonas_stutzeri_A1501                           | 98,925    | Gamma proteobacteria |
| 17d5b4757a75ad4a6a6a8714e6724aeb | 727   | 0,49     | 213578830 1B B 1 FJ170277_complement_13629_14492 Uncultured_cyanobacterium_group_A_nif_cluster | 100       | UCYN-A1              |
| e8681f8ab1563b2921531f4d68020eb0 | 581   | 0,39     | 213578830 1B B 1 FJ170277_complement_13629_14492 Uncultured_cyanobacterium_group_A_nif_cluster | 98,925    | UCYN-A4              |
| 5cb4ec245b40a8d3760ca91743295b55 | 411   | 0,28     | 213578830 1B B 1 FJ170277_complement_13629_14492 Uncultured_cyanobacterium_group_A_nif_cluster | 100       | UCYN-A4              |
| 806cee9c1b2488bacb2a595080138b42 | 409   | 0,28     | 213578830 1B B 1 FJ170277_complement_13629_14492 Uncultured_cyanobacterium_group_A_nif_cluster | 100       | UCYN-A1              |
| f66f288c4a3ce20feb425c205abff587 | 311   | 0,21     | 213578830 1B B 1 FJ170277_complement_13629_14492 Uncultured_cyanobacterium_group_A_nif_cluster | 100       | UCYN-A4              |
| 3aa5d34aa2ac8a8f7506577551a510a0 | 293   | 0,20     | 145569915 1G B 1 1432264_1433145_CP000304 Pseudomonas_stutzeri_A1501                           | 98,925    | Gamma proteobacteria |
| 792d37be15059dfb929140300a7f7a4a | 234   | 0,16     | 213578830 1B B 1 FJ170277_complement_13629_14492 Uncultured_cyanobacterium_group_A_nif_cluster | 100       | UCYN-A2              |
| 15464fc769f26e7ea2e0d3ee53e52a57 | 225   | 0,15     | 237685316 1G B 1 1597309_1598187_CP001614 Teredinibacter_turnerae_T7901                        | 94,624    | Gamma proteobacteria |

Figure S1: Comparison between  $^{13}\text{C}$ -PP and  $^{14}\text{C}$ -PP measured in the particulate matter during the dust seeding experiments

In situ samples for  $^{13}\text{C}$ -PP and  $^{14}\text{C}$ -PP were not systematically measured at the same depths ( $\pm 10$  m) and on the same day; seawater for  $^{14}\text{C}$ -PP was collected with the classical rosette (Niskin bottles) (Maranon et al., 2021) while  $^{13}\text{C}$ -PP seawater was sampled with the trace metal clean rosette. We therefore chose to use  $^{13}\text{C}$ -PP data to estimate the contribution of  $\text{N}_2$  fixation to PP because both parameters were measured simultaneously in the same bottle. Nevertheless the shapes of the profiles and trends are similar with both data sets. In addition,  $^{14}\text{C}$ -PP (Gazeau et al., 2021b) and  $^{13}\text{C}$ -PP were measured in parallel during the dust seeding experiments and the correlation between  $^{13}\text{C}$ -PP and  $^{14}\text{C}$ -PP values was very strong ( $r=0.97$ ,  $p<0.0001$ ,  $n=72$ ) as shown in the figure below

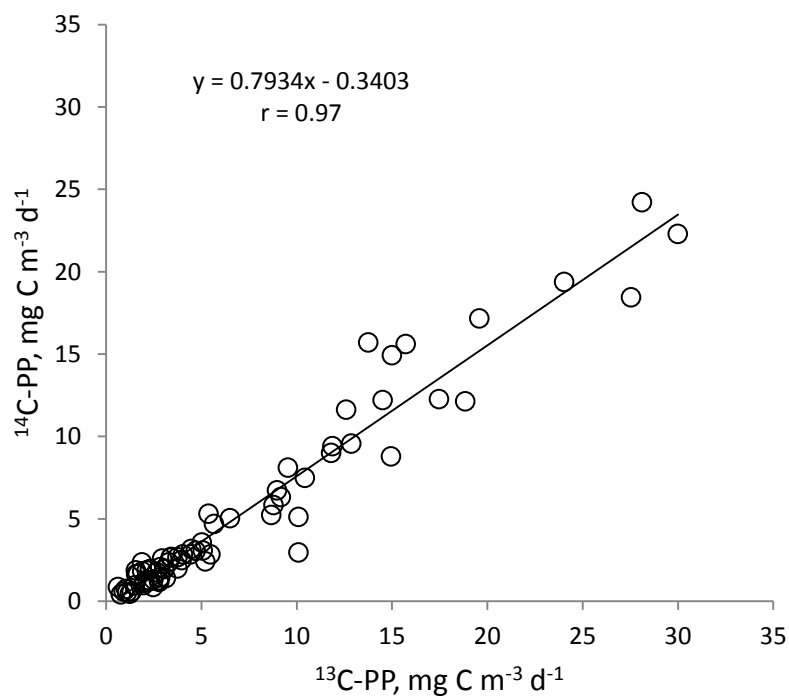

Figure S2 : Integrated primary production (PP) (a) and heterotrophic bacterial production (BP) (b) from surface to euphotic layer depth along the longitudinal PEACETIME transect

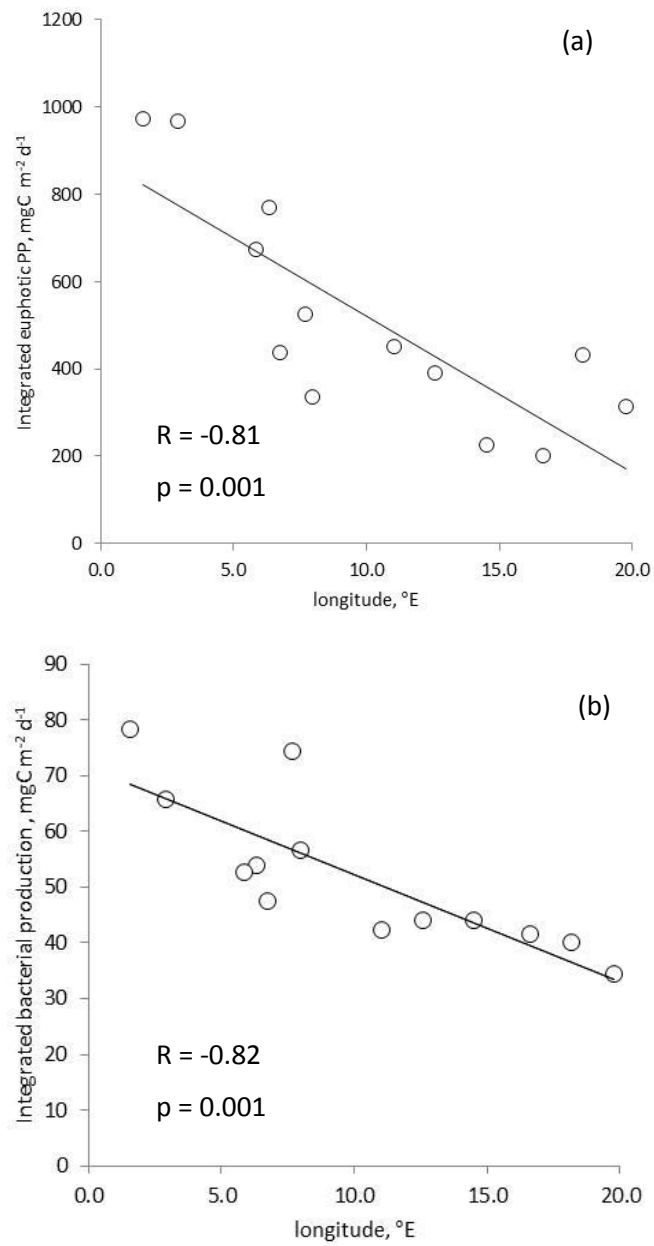

Figure S3 : Slope (and standard deviation) of N<sub>2</sub> fixation (a-c) versus time in the controls (C, black), dust treatments under present climate conditions (D, red) and dust treatments under future climate conditions (G, green) during the dust seeding experiments at TYR, ION and FAST. Only data presenting a significant linear relationship with time (Pearson's correlation coefficient,  $p < 0.05$ ) were included. Slopes that were significantly different within one experiment are labelled with different letters (A, B, C).

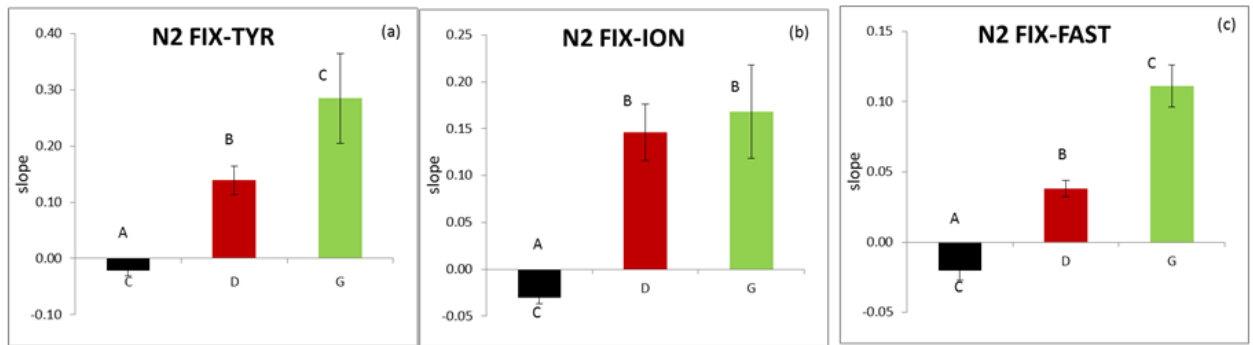

Figure S4: Relationship between N<sub>2</sub> fixation and (a) bacterial production (BP) at TYR, (b) BP at ION, and (c) primary production (PP) at FAST, during the dust seeding experiments

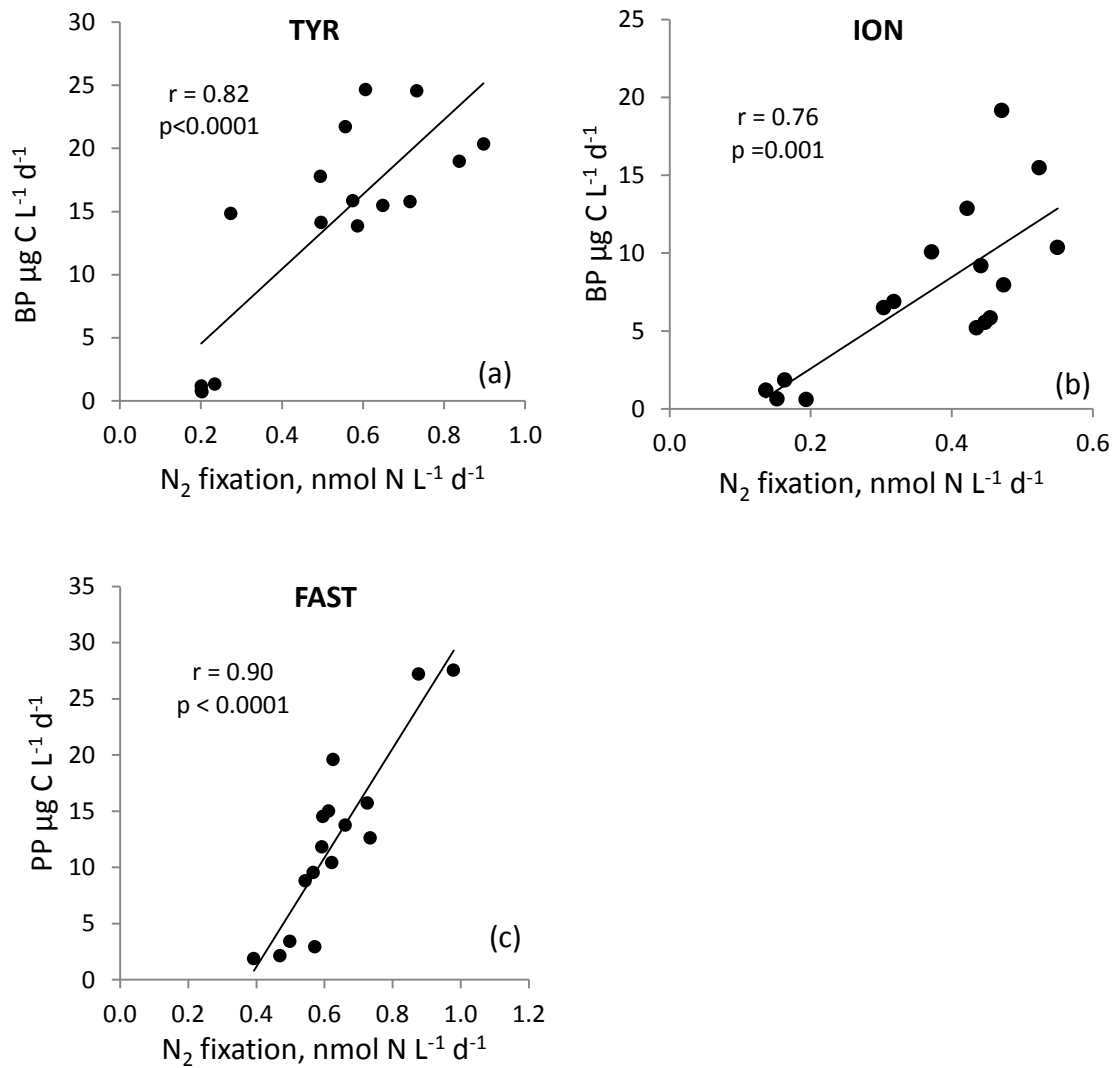

Pearson correlation coefficient (and associated p-value, in bold p-value < 0.05) between N<sub>2</sub> fixation rates and bacterial production (BP), primary production (<sup>13</sup>PP), measured during the dust seeding experiments at stations TYR, ION and FAST

|                  | N <sub>2</sub> Fix-TYR | N <sub>2</sub> Fix-ION | N <sub>2</sub> Fix-FAST  |
|------------------|------------------------|------------------------|--------------------------|
| BP               | 0.82 (<0.0001)         | 0.76 (0.001)           | 0.36 (0.17)              |
| <sup>13</sup> PP | 0.59 (0.12)            | 0.44 (0.09)            | <b>0.90 (&lt;0.0001)</b> |



Figure S5: Principal coordinate analysis of diazotroph communities. Distances between samples were calculated as Bray-Curtis dissimilarity. Only ASVs above 1% relative abundance were included in this analysis

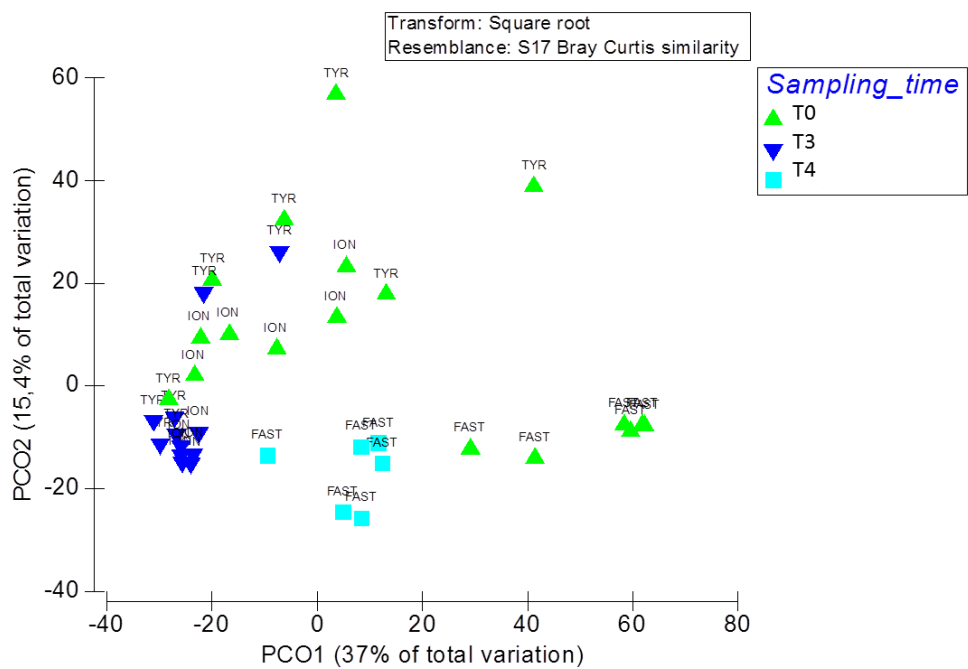

Figure S6: Changes in the general diversity trends visualized by Shannon H index, during the dust seeding experiments at TYR, ION and FAST between initial time (dot) and final time (square) connected by a line to indicate directional change in diversity following each incubation experiment. Shows that for TYR and ION the diversity decrease from T0 to Tend whereas the opposite is true for FAST.

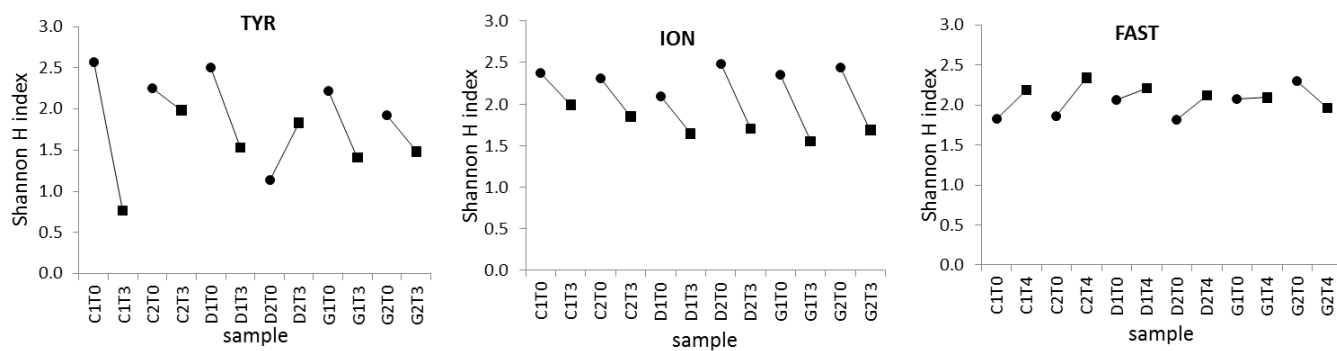

Figure S7: Correlation between surface N<sub>2</sub> fixation rate and (a) the relative abundance of UCYN-A (b) the relative abundance of NCD.

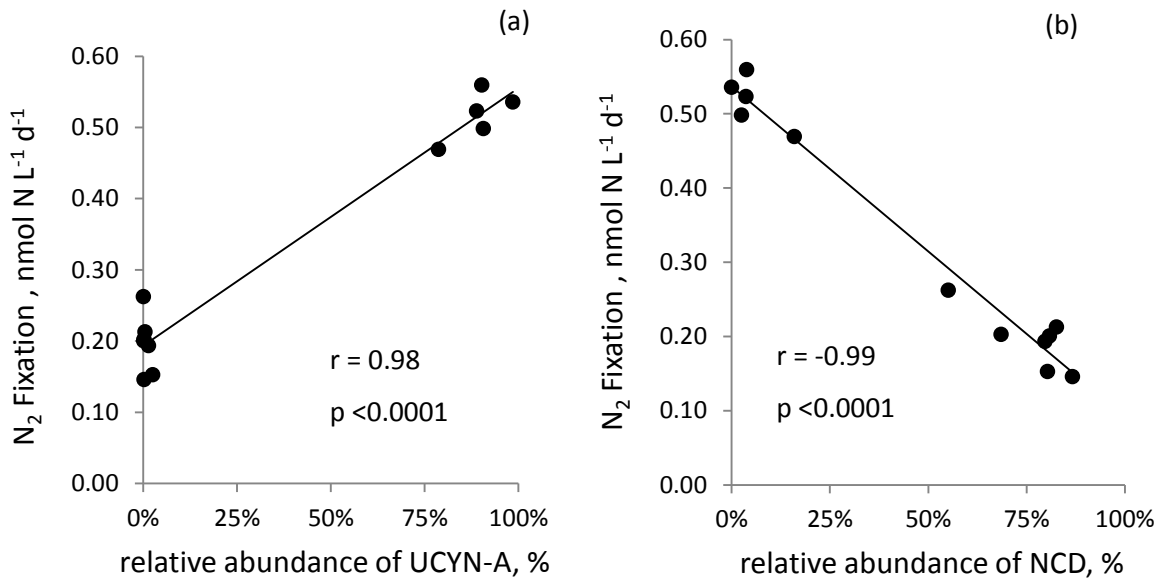

Figure S8: Contribution (in %) of N<sub>2</sub> fixation to primary production (PP, in blue) and to bacterial production (BP, in green) at the studied stations.

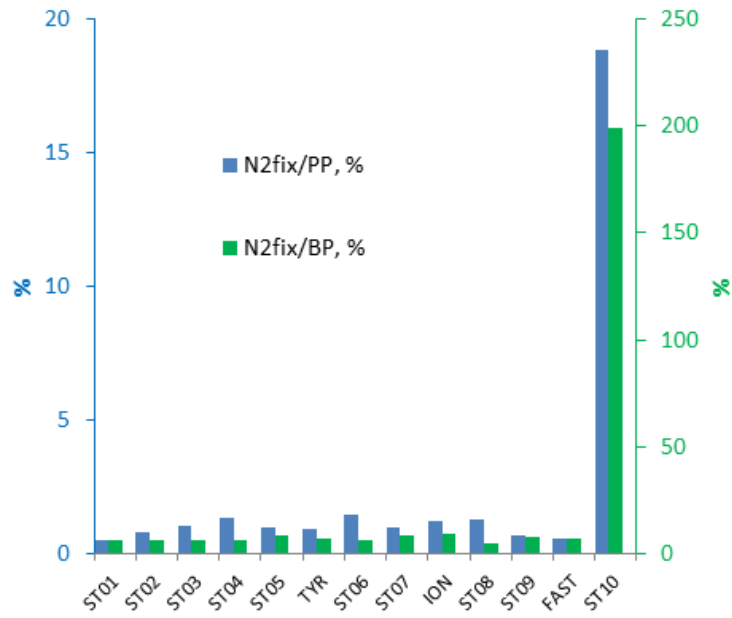

Figure S9: Box plots of the relative changes (in %) in  $^{13}\text{C}$ -primary production (PP) over the duration of the dust seeding experiments at TYR, ION, and FAST stations. D means dust treatments under present climate conditions and G dust treatments under future climate conditions.

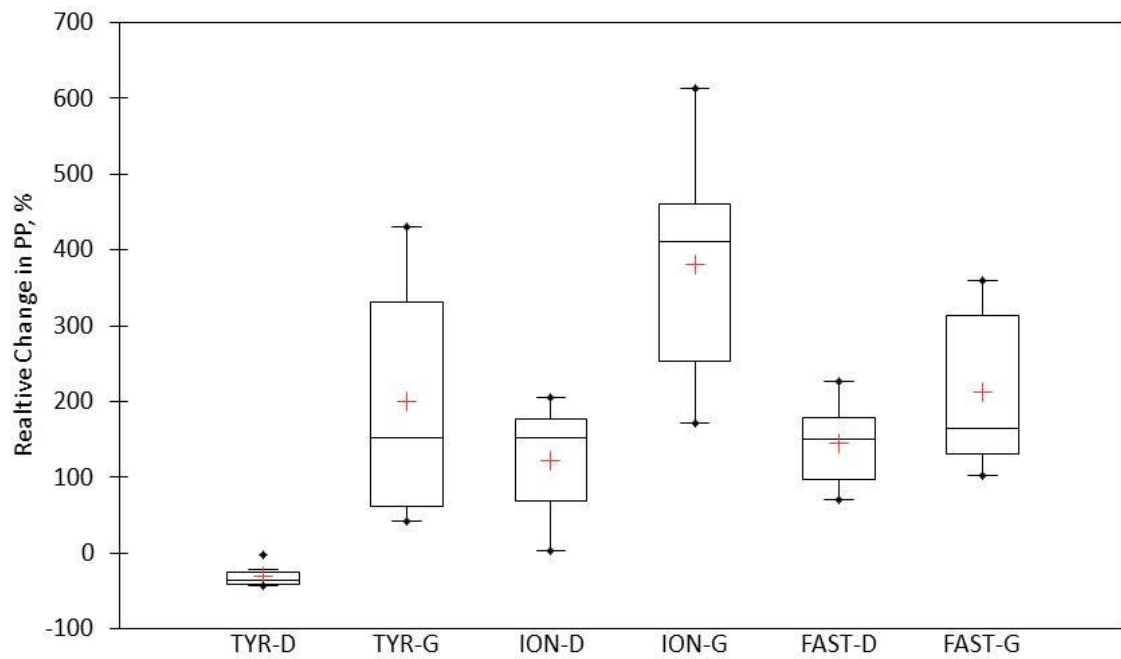

Supplement: Supplementary file 1 [file bg-19-415-2022-supplement.pdf]
